# Supplementary material for: A rank-based transcriptional signature for predicting relapse risk of stage II colorectal cancer identified with proper data sources
Source: Oncotarget. 2016 Mar 7;7(14):19060–71. doi: 10.18632/oncotarget.7956 (PMC4951352; doi:10.18632/oncotarget.7956)
Supplement: Supplementary file 1 [file oncotarget-07-19060-s001.pdf]

## A rank-based transcriptional signature for predicting relapse risk of stage II colorectal cancer identified with proper data sources

### Supplementary Material

**Supplementary Table S1: Description of the six CRC datasets contained stage II CRC**

| without CTX   |           |                   |                      |
|---------------|-----------|-------------------|----------------------|
| GEO Accession | Platforms | Stage II CTX CRC# | Stage II no CTX CRC# |
| GSE24550      | GPL5175   | --                | 44                   |
| GSE30378      | GPL5175   | 0                 | 52                   |
| GSE31595      | GPL570    | 0                 | 20                   |
| GSE17536      | GPL570    | 0                 | 57                   |
| GSE14333      | GPL570    | 22                | 72                   |
| GSE39582      | GPL570    | 56                | 203                  |

**Abbreviations:** -- means not available. CTX, the patients with completely resected tumors who received adjuvant chemotherapy. No CTX, the patients with completely resected tumors who did not receive any adjuvant chemotherapy.

**Supplementary Table S2: The 15 prognosis-associated gene pairs**

| <b>Id</b> | <b>Gene a</b> | <b>Gene b</b> |
|-----------|---------------|---------------|
| 1         | ORC1          | OLR1          |
| 2         | FBXO9         | MTNR1A        |
| 3         | RFX5          | MMP14         |
| 4         | MTNR1A        | VGLL1         |
| 5         | DLGAP1-AS2    | CHSY3         |
| 6         | SUV39H2       | OLR1          |
| 7         | FXN           | ANGPTL4       |
| 8         | DANCR         | VKORC1        |
| 9         | SUV39H2       | FIBIN         |
| 10        | TRAF3         | COLEC12       |
| 11        | SLC12A2       | AZIN1         |
| 12        | TROVE2        | ZC3H12A       |
| 13        | GSG2          | OLR1          |
| 14        | LRRC40        | THBS3         |
| 15        | RSPO3         | SCAI          |

**Note:** all the  $E_a < E_b$  REOs was associated with poor patient survival.

**Supplementary Table S3: The GSP of the risk of relapse on stage II CRC**

| Gene A | Gene B | Beta coefficients | Log-rank <i>p</i> value |
|--------|--------|-------------------|-------------------------|
| ORC1   | OLR1   | 1.355             | 3.5 x 10 <sup>-4</sup>  |
| MTNR1A | VGLL1  | 1.074             | 7.4 x 10 <sup>-4</sup>  |
| RFX5   | MMP14  | 1.152             | 3.7 x 10 <sup>-4</sup>  |

Note: all the *Ea* < *Eb* REOs was associated with poor patient survival.
